# Supplementary material for: Investigating Awareness Regarding Travel-Related Infectious Disease Prevention in a Metropolitan Area
Source: MDPI journal article supplement (doi:10.3390/tropicalmed8100476), 2023-10-18
Supplement: s1 [file s1]

## Supplementary Materials

**Table S1.** Knowledge of respondents regarding travel-related infectious diseases.

| N.  | Statement ( <i>Variables</i> )                                                                                        | Agree (%) | Uncertain (%) | Disagree (%) |
|-----|-----------------------------------------------------------------------------------------------------------------------|-----------|---------------|--------------|
| K1  | Infections occur when bacteria, viruses, or fungi enter the body.                                                     | 46.8      | 27.9          | 25.4         |
| K2  | A temperature above 38°C is considered a fever.                                                                       | 32.4      | 35.7          | 31.9         |
| K3  | Contaminated water is a significant source of infection transmission.                                                 | 40.5      | 35.1          | 24.4         |
| K4  | Mosquitoes can transmit diseases.                                                                                     | 48.3      | 28.7          | 23           |
| K5  | Infections cannot be transmitted through properly cooked food.                                                        | 30.9      | 38.9          | 30.2         |
| K6  | Antibiotics are effective against viruses.                                                                            | 26.7      | 35.8          | 37.5         |
| K7  | Vaccines stimulate antibody production.                                                                               | 44.9      | 30.6          | 24.5         |
| K8  | Access to free medical assistance is available in all countries of the world.                                         | 25.1      | 31.6          | 43.3         |
| K9  | Currently, there are 10 mandatory vaccines in Italy.                                                                  | 29.7      | 46.3          | 24           |
| K10 | Italy's Territorial Units of The Maritime, Air and Border Health Offices (USMAF) provides vaccinations before travel. | 25.9      | 42.3          | 31.8         |

**Table S2.** Attitude of respondents toward travel-related infectious diseases.

| N.  | Statement ( <i>Variables</i> )                                        | Agree (%) | Uncertain (%) | Disagree (%) |
|-----|-----------------------------------------------------------------------|-----------|---------------|--------------|
| A1  | Packing drugs for travel may not be necessary.                        | 33        | 31.6          | 35.4         |
| A2  | Disinfecting is necessary after a cut.                                | 44.7      | 30.1          | 25.2         |
| A3  | Drinking tap water while traveling can be a wiser option.             | 30.9      | 32.7          | 36.4         |
| A4  | Covering mouth when sneezing or coughing is not important.            | 22.7      | 29.8          | 47.5         |
| A5  | It is important to carry sanitizer.                                   | 46.7      | 29.7          | 23.6         |
| A6  | Eating with hands can be enjoyable.                                   | 26.9      | 32.6          | 40.5         |
| A7  | Mosquito sprays are essentials to have.                               | 37.2      | 34.4          | 28.4         |
| A8  | Wearing a mask when using public transportation may not be necessary. | 36.9      | 32.9          | 30.2         |
| A9  | Medical insurance is useless when traveling.                          | 29.6      | 30.2          | 40.2         |
| A10 | It's useful to research necessary vaccines before traveling.          | 43.2      | 28.5          | 28.3         |

**Table S3.** Behaviours of respondents concerning travel-related infectious diseases.

| N.  | Questions                                                                         | Yes/Always (%) | Often (%) | Sometime (%) | Never (%) |
|-----|-----------------------------------------------------------------------------------|----------------|-----------|--------------|-----------|
| B1  | Do you travel abroad?                                                             | 30.7           | 27.5      | 19.6         | 22.2      |
| B2  | Do you carry medications when traveling?                                          | 28.3           | 28.1      | 13.4         | 30.2      |
| B3  | When you're on vacation, do you try local foods even if they are not cooked?      | 29.2           | 27.1      | 19.1         | 24.6      |
| B4  | Do you only drink bottled water when you're abroad?                               | 27.6           | 26.9      | 16.3         | 29.2      |
| B5  | Do you frequently eat food from street vendors when traveling abroad?             | 27.3           | 29.5      | 19.1         | 24.1      |
| B6  | Do you check whether you need any vaccines before going on a trip?                | 32.2           | 27.3      | 15.3         | 25.2      |
| B7  | Do you use products like sprays, diffusers, or bracelets to avoid mosquito bites? | 36.9           | 27.7      | 14.3         | 21.1      |
| B8  | Do you consume iced drinks often?                                                 | 34.2           | 26.7      | 20.9         | 18.2      |
| B9  | Do you always keep your medical records with you?                                 | 29.8           | 27.7      | 16.1         | 26.4      |
| B10 | Do you sign up for medical coverage when traveling abroad?                        | 37.3           | 32.6      | 12.3         | 17.8      |
